# Supplementary material for: Exploring the Relationship Between Mental Well-Being, Exercise Routines, and the Intake of Image and Performance Enhancing Drugs During the Coronavirus Disease 2019 Pandemic: A Comparison Across Sport Disciplines
Source: Frontiers journal article supplement (doi:10.3389/fpsyg.2021.689058), 2021-07-06
Supplement: Data_Sheet_1.PDF [file Data_Sheet_1.PDF]

## Supplementary Material

### 1 Supplementary Data

Supplementary Table 1.1 *Percentages of supplements use*

| Types of IPEDs          |       | Percentage   |      |
|-------------------------|-------|--------------|------|
| Caffeine                | 42.3% | Mineral Salt | 8.3% |
| Whey protein            | 39.4% | Taurine      | 7.5% |
| Infusions               | 37.9% | Guaran       | 7.5% |
| Vitamins                | 37.2% | Ginseng      | 4.8% |
| Multivitamin supplement | 29.3% | Glucosamine  | 3.5% |
| Omega 3 Fish Oil        | 25.3% | Beta alanine | 2.3% |
| Creatine                | 23.1% | Nitric Oxide | 1.9% |
| Amino Acids             | 22.1% | Ketones      | 1.2% |
| Multimineral supplement | 16.3% | Pyruvate     | 0.8% |
| Herbal medicine         | 12.5% |              |      |
| Turmeric                | 12.4% |              |      |
| Green tea extract       | 10.9% |              |      |

|              |       |
|--------------|-------|
| Glutamate    | 10.3% |
| Carnitine    | 9.6%  |
| Fish Oil     | 9.6%  |
| Antioxidants | 8.4%  |

Supplementary Table 1.2. *Percentages of off-label medications/drugs use*

| Types of IPEDs                                | Percentage |                                                                        |      |
|-----------------------------------------------|------------|------------------------------------------------------------------------|------|
| Ibuprofen                                     | 9.9%       | Androgenic substances<br>(e.g. steroids)                               | 1.6% |
| Diuretics                                     | 6.5%       | Beta Blockers                                                          | 1.6% |
| Laxatives                                     | 6.3%       | Hormones (e.g. pvz, EPO, insulin) or related<br>(e.g. beta-2 agonists) | 1.5% |
| Stimulants<br>(e.g. amphetamine, modafinilas) | 2.7%       | Glucocorticoids                                                        | 0.4% |
| Orlistat                                      | 1.8%       |                                                                        |      |

Supplementary Table 1.3. *Sources of purchase (%)*

| Sources of purchase | Percentage |
|---------------------|------------|
|---------------------|------------|

|                        |       |
|------------------------|-------|
| Pharmacy               | 43.3% |
| Internet               | 41.0% |
| Specialised Food Store | 29.9% |
| Food Store             | 28.1% |
| Other                  | 3.5%  |
| Black Market           | 1.0%  |

Supplementary Table 2. *ANOVA among the sports disciplines*

| Sports          | EAI        |                      |
|-----------------|------------|----------------------|
| Generic Workout | 17.11±3.75 | F = 8.11<br>p < .001 |
| Walking         | 15.77±3.83 |                      |
| Weight Lifting  | 18.02±3.70 |                      |
| Running         | 17.79±3.46 |                      |
| Yoga            | 16.65±3.86 |                      |
| Fighting Sports | 17.70±3.72 |                      |
| Swimming        | 16.98±3.28 |                      |
| Dance           | 17.41±3.64 |                      |

|              |            |
|--------------|------------|
| Martial Arts | 17.76±3.38 |
| Cycling      | 16.44±3.58 |
| Ball Sports  | 17.62±4.49 |
| Budo         | 17.36±3.04 |
| Cross Fit    | 19.06±3.86 |

| Sports          | AAI        |                      |
|-----------------|------------|----------------------|
| Generic Workout | 17.19±5.42 | F = 6.98<br>p < .001 |
| Walking         | 16.36±5.64 |                      |
| Weight Lifting  | 18.35±5.93 |                      |
| Running         | 16.40±5.57 |                      |
| Yoga            | 16.18±4.76 |                      |
| Fighting Sports | 15.51±5.07 |                      |
| Swimming        | 15.69±4.81 |                      |
| Dance           | 18.09±6.16 |                      |
| Martial Sports  | 15.75±5.23 |                      |
| Cycling         | 14.29±4.41 |                      |
| Ball Sports     | 16.49±4.95 |                      |
| Budo            | 14.60±4.37 |                      |
| Cross Fit       | 18.46±5.53 |                      |

NAG 16.65±5.59

| Sports          | SCS        |                      |
|-----------------|------------|----------------------|
| Generic Workout | 30.87±5.96 | F = 1.64<br>p < .052 |
| Walking         | 31.11±6.10 |                      |
| Weight Lifting  | 30.27±6.10 |                      |
| Running         | 31.18±6.04 |                      |
| Yoga            | 31.70±5.70 |                      |
| Fighting Sports | 31.40±5.53 |                      |
| Swimming        | 31.42±5.94 |                      |
| Dance           | 30.46±7.08 |                      |
| Martial Arts    | 31.20±5.64 |                      |
| Cycling         | 32.82±5.83 |                      |
| Ball Sports     | 30.00±6.25 |                      |
| Budo            | 31.33±5.57 |                      |
| Cross Fit       | 31.49±5.54 |                      |
| NAG             | 30.54±5.78 |                      |

Supplementary Table 3.1. *Tamhane's T2 method based post-hoc analysis on ANOVA (EAI)*

| Multiple Comparisons    |           |                    |                             |               |      |                                    |
|-------------------------|-----------|--------------------|-----------------------------|---------------|------|------------------------------------|
| Dependent Variable: EAI |           |                    |                             |               |      |                                    |
| Tamhane's<br>T2         | (I) Sport | (J) Sport          | Mean<br>Difference<br>(I-J) | Std.<br>Error | Sig. | 95% Confidence<br>Interval         |
|                         |           |                    |                             |               |      | Lower<br>Bound      Upper<br>Bound |
| Running                 |           | Yoga               | 1.14*                       | .315          | .027 | .06      2.22                      |
|                         |           | Walking            | 2.02*                       | .284          | .000 | 1.05      2.99                     |
| Swimming                |           | Cross Fit          | -2.09*                      | .563          | .020 | -4.02      -.15                    |
| Fighting<br>Sports      |           | Walking            | 1.93*                       | .359          | .000 | .70      3.16                      |
| Martial Arts            |           | Walking            | 1.99*                       | .400          | .000 | .62      3.37                      |
| Budo                    |           | -                  | -                           | -             | -    | -      -                           |
| Cycling                 |           | Weight Lift        | -1.58*                      | .420          | .017 | -3.01      -.14                    |
|                         |           | Cross Fit          | -2.62*                      | .595          | .001 | -4.66      -.58                    |
| Ball Sports             |           | Walking            | 1.85*                       | .471          | .009 | .23      2.48                      |
| Generic<br>Workout      |           | Weight Lift        | -.91*                       | .237          | .011 | -1.73      -.10                    |
|                         |           | Cross Fit          | -1.96*                      | .484          | .005 | -3.62      -.30                    |
|                         |           | Walking            | 1.34*                       | .230          | .000 | .55      2.13                      |
| Weight<br>Lifting       |           | Cycling            | 1.58*                       | .420          | .017 | .14      3.01                      |
|                         |           | Generic<br>Workout | .91*                        | .237          | .011 | .10      1.73                      |
|                         |           | Yoga               | 1.37*                       | .304          | .001 | .33      2.41                      |
|                         |           | Walking            | 2.25*                       | .271          | .000 | 1.32      3.18                     |

|           |                 |        |      |      |       |       |
|-----------|-----------------|--------|------|------|-------|-------|
| Cross Fit | Swim            | 2.09*  | .563 | .020 | .15   | 4.02  |
|           | Cycling         | 2.62*  | .595 | .001 | .58   | 4.66  |
|           | Generic Workout | 1.96*  | .500 | .001 | .40   | 3.51  |
|           | Yoga            | 2.42*  | .520 | .000 | .63   | 4.20  |
|           | Walking         | 3.30*  | .502 | .000 | 1.58  | 5.02  |
|           | Other           | 2.52*  | .633 | .007 | .35   | 4.69  |
| Mountain  | Walking         | 2.12*  | .536 | .008 | .28   | 3.96  |
| Yoga      | Run             | -1.14* | .315 | .027 | -2.22 | -.06  |
|           | Weight Lift     | -1.37* | .304 | .001 | -2.41 | -.33  |
|           | Cross Fit       | -2.42* | .520 | .000 | -4.20 | -.63  |
| Walking   | Run             | -2.02* | .284 | .000 | -2.99 | -1.05 |
|           | Fighting Sports | -1.93* | .359 | .000 | -3.16 | -.70  |
|           | Martial Arts    | -1.99* | .400 | .000 | -3.37 | -.62  |
|           | Ball Sports     | -1.85* | .471 | .009 | -3.46 | -.23  |
|           | Generic Workout | -1.34* | .230 | .000 | -2.13 | -.55  |
|           | Weight Lift     | -2.25* | .271 | .000 | -3.18 | -1.32 |
|           | Cross Fit       | -3.30* | .502 | .000 | -5.02 | -1.58 |
|           | Mountain        | -2.12* | .536 | .008 | -3.96 | -.28  |
|           | Dance           | -1.64* | .377 | .001 | -2.93 | -.35  |
| Tennis    | -               | -      | -    | -    | -     | -     |

|       |           |        |      |      |       |      |
|-------|-----------|--------|------|------|-------|------|
| Other | Cross Fit | -2.52* | .633 | .007 | -4.69 | -.35 |
| Dance | Walking   | 1.64*  | .377 | .001 | .35   | 2.93 |

Supplementary Table 3.2. *Tamhane's T2 method based post-hoc analysis on ANOVA (AAI)*

| Multiple Comparisons    |                            |                |                             |               |      |                            |                |
|-------------------------|----------------------------|----------------|-----------------------------|---------------|------|----------------------------|----------------|
| Dependent Variable: AAI |                            |                |                             |               |      |                            |                |
| Tamhane's<br>T2         | (I) Sports                 | (J) Sports     | Mean<br>Difference<br>(I-J) | Std.<br>Error | Sig. | 95% Confidence<br>Interval |                |
|                         |                            |                |                             |               |      | Lower<br>Bound             | Upper<br>Bound |
|                         | Run <b>ning</b>            | Weight<br>Lift | -1.95*                      | .426          | .001 | -3.42                      | -.48           |
|                         | Swim <b>ming</b>           | Weight<br>Lift | -2.66*                      | .550          | .000 | -4.56                      | -.75           |
|                         |                            | Dance          | -2.40*                      | .671          | .034 | -4.72                      | -.08           |
|                         | Fight <b>ing</b><br>Sports | Weight<br>Lift | -2.84*                      | .535          | .000 | -4.69                      | -.99           |
|                         |                            | Cross Fit      | -2.95*                      | .820          | .031 | -5.79                      | -.12           |
|                         |                            | Dance          | -2.58*                      | .658          | .010 | -4.86                      | -.30           |
|                         | Martial<br>Arts            | Weight<br>Lift | -2.61*                      | .595          | .002 | -4.67                      | -.54           |



|                 |                 |        |      |      |       |       |
|-----------------|-----------------|--------|------|------|-------|-------|
| Budo            | Generic Workout | -2.59* | .693 | .019 | -4.99 | -.20  |
|                 | Weight Lift     | -3.75* | .724 | .000 | -6.25 | -1.24 |
|                 | Cross Fit       | -3.86* | .954 | .006 | -7.16 | -.56  |
|                 | Dance           | -3.49* | .820 | .003 | -6.33 | -.65  |
| Cycling         | None            | -2.36* | .633 | .020 | -4.55 | -.17  |
|                 | Generic Workout | -2.91* | .581 | .000 | -4.92 | -.90  |
|                 | Weight Lift     | -4.06* | .618 | .000 | -6.20 | -1.93 |
|                 | Cross Fit       | -4.18* | .876 | .000 | -7.21 | -1.14 |
|                 | Dance           | -3.81* | .728 | .000 | -6.33 | -1.29 |
| Ball Sports     | -               | -      | -    | -    | -     | -     |
| Generic Workout | Budo            | 2.59*  | .693 | .019 | .20   | 4.99  |
|                 | Cycling         | 2.91*  | .581 | .000 | .90   | 4.92  |
| Weight Lifting  | None            | 1.70*  | .431 | .009 | .21   | 3.20  |
|                 | Run             | 1.95*  | .426 | .001 | .48   | 3.42  |
|                 | Swim            | 2.66*  | .550 | .000 | .75   | 4.56  |
|                 | Fighting Sports | 2.84*  | .535 | .000 | .99   | 4.69  |
|                 | Martial Arts    | 2.61*  | .595 | .002 | .54   | 4.67  |

---

|           |                 |        |      |      |       |      |
|-----------|-----------------|--------|------|------|-------|------|
|           | Budo            | 3.75*  | .724 | .000 | 1.24  | 6.25 |
|           | Cycling         | 4.06*  | .618 | .000 | 1.93  | 6.20 |
|           | Mountain        | 3.27*  | .794 | .004 | .53   | 6.02 |
|           | Yoga            | 2.17*  | .447 | .000 | .62   | 3.71 |
|           | Walking         | 1.99*  | .400 | .000 | .61   | 3.37 |
|           | Tennis          | 3.38*  | .963 | .043 | .04   | 6.71 |
| Cross Fit | Fighting Sports | 2.95*  | .820 | .031 | .12   | 5.79 |
|           | Budo            | 3.86*  | .954 | .006 | .56   | 7.16 |
|           | Cycling         | 4.18*  | .876 | .000 | 1.14  | 7.21 |
| Mountain  | Weight Lift     | -3.27* | .794 | .004 | -6.02 | -.53 |
| Yoga      | Weight Lift     | -2.17* | .447 | .000 | -3.71 | -.62 |
| Walking   | Weight Lift     | -1.99* | .400 | .000 | -3.37 | -.61 |
| Tennis    | Weight Lift     | -3.38* | .963 | .043 | -6.71 | -.04 |
| Other     | -               | -      | -    | -    | -     | -    |
| Dance     | Swim            | 2.40*  | .671 | .034 | .08   | 4.72 |
|           | Fighting Sports | 2.58*  | .658 | .010 | .30   | 4.86 |
|           | Budo            | 3.49*  | .820 | .003 | .65   | 6.33 |

---

|  |         |       |      |      |      |      |
|--|---------|-------|------|------|------|------|
|  | Cycling | 3.81* | .728 | .000 | 1.29 | 6.33 |
|--|---------|-------|------|------|------|------|

Supplementary Table 4. *Specification of each sports discipline*

|                                                            | Generic Workout<br>(N=769) | Others Exercise<br>(N=1238) |                                                |
|------------------------------------------------------------|----------------------------|-----------------------------|------------------------------------------------|
| Usage of IPEDs                                             | 266(34.6%)                 | 428(34.6%)                  | $\chi^2 = 0.00$ p = 0.993                      |
| Increase of smoking                                        | 50(31.8%)                  | 73(35.6%)                   | $\chi^2 = 0.56$ p = 0.454                      |
| Increase of drinking                                       | 92(12.0%)                  | 205(16.6%)                  | <b><math>\chi^2 = 7.95</math> p = 0.005</b>    |
| History of addiction                                       | 50(6.5%)                   | 92(7.4%)                    | $\chi^2 = 0.623$ p = .430                      |
| Worsening the addiction problem during physical distancing | 15(30.0%)                  | 27(29.3%)                   | $\chi^2 = 0.007$ p = .935                      |
|                                                            | Walking<br>(N=387)         | Other Exercise<br>(N=1620)  |                                                |
| Usage of IPEDs                                             | 95(24.5%)                  | 599(37.0%)                  | <b><math>\chi^2 = 21.33</math> p &lt;0.001</b> |
| Increase of smoking                                        | 22(31.0%)                  | 101(34.7%)                  | $\chi^2 = 0.35$ p =0.553                       |
| Increase of drinking                                       | 55(14.2%)                  | 242(14.9%)                  | $\chi^2 = 0.13$ p =0.718                       |
| History of addiction                                       | 39(10.1%)                  | 103(6.4%)                   | <b><math>\chi^2 = 6.573</math> p = .010</b>    |

|                                                            |           |           |                          |
|------------------------------------------------------------|-----------|-----------|--------------------------|
| Worsening the addiction problem during physical distancing | 15(38.5%) | 27(26.2%) | $\chi^2 = 2.037$ p= .153 |
|------------------------------------------------------------|-----------|-----------|--------------------------|

---

|                                                            | <b>Weight Lifting</b><br>(N=355) | <b>Others Exercise</b><br>(N=1652) |                            |
|------------------------------------------------------------|----------------------------------|------------------------------------|----------------------------|
| <hr/>                                                      |                                  |                                    |                            |
| Usage of IPEDs                                             | 217(61.1%)                       | 477(28.9%)                         | $\chi^2 = 134.37$ p< 0.001 |
| Increase of smoking                                        | 9(17.3%)                         | 114(36.8%)                         | $\chi^2 = 7.52$ p= 0.006   |
| Increase of drinking                                       | 62(17.5%)                        | 235(14.2)                          | $\chi^2 = 2.43$ p= 0.119   |
| History of addiction                                       | 19(5.4%)                         | 123(7.4%)                          | $\chi^2 = 1.948$ p= .163   |
| Worsening the addiction problem during physical distancing | 8(42.1%)                         | 34(27.6%)                          | $\chi^2 = 1.653$ p= .199   |

---



---

|                                                            | <b>Running</b><br>(N=301) | <b>Others Exercise</b><br>(N=1706) |                          |
|------------------------------------------------------------|---------------------------|------------------------------------|--------------------------|
| <hr/>                                                      |                           |                                    |                          |
| Usage of IPEDs                                             | 115(38.2%)                | 579(33.9%)                         | $\chi^2 = 2.06$ p=0.151  |
| Increase of smoking                                        | 18(35.3%)                 | 105(33.8%)                         | $\chi^2 = 0.05$ p=0.830  |
| Increase of drinking                                       | 53(17.6%)                 | 244(14.3%)                         | $\chi^2 = 2.22$ p=0.136  |
| History of addiction                                       | 22(7.3%)                  | 120(7.0%)                          | $\chi^2 = 0.029$ p= .864 |
| Worsening the addiction problem during physical distancing | 5(22.7%)                  | 37(30.8%)                          | $\chi^2 = 0.586$ p= .444 |

---

|                                                            | <b>Yoga<br/>(N=253)</b>            | <b>Others Exercise<br/>(N=1754)</b> |                                             |
|------------------------------------------------------------|------------------------------------|-------------------------------------|---------------------------------------------|
| Usage of IPEDs                                             | 79(31.2%)                          | 615(35.1%)                          | $\chi^2 = 1.44$ p= 0.230                    |
| Increase of smoking                                        | 13(39.4%)                          | 110(33.4%)                          | $\chi^2 = 0.48$ p= 0.491                    |
| Increase of drinking                                       | 38(15.0%)                          | 259(14.8%)                          | $\chi^2 = 0.01$ p= 0.915                    |
| History of addiction                                       | 14(5.5%)                           | 128(7.3%)                           | $\chi^2 = 1.046$ p= .306                    |
| Worsening the addiction problem during physical distancing | 5(35.7%)                           | 37(28.9%)                           | $\chi^2 = 0.281$ p= .596                    |
|                                                            | <b>Fighting sports<br/>(N=146)</b> | <b>Others Exercise<br/>(N=1861)</b> |                                             |
| Usage of IPEDs                                             | 53(36.3%)                          | 641(34.4%)                          | $\chi^2 = 0.21$ p = 0.650                   |
| Increase of smoking                                        | 13(61.9%)                          | 110(32.3%)                          | <b><math>\chi^2 = 7.75</math> p = 0.005</b> |
| Increase of drinking                                       | 23(15.8%)                          | 274(14.7%)                          | $\chi^2 = 0.11$ p = 0.736                   |
| History of addiction                                       | 11(7.5%)                           | 131(7.0%)                           | $\chi^2 = 0.050$ p= .822                    |
| Worsening the addiction problem during physical distancing | 5(54.5%)                           | 37(28.2%)                           | $\chi^2 = 1.443$ p= .230                    |
|                                                            | <b>Swimming<br/>(N=135)</b>        | <b>Others Exercise<br/>(N=1872)</b> |                                             |
| Usage of IPEDs                                             | 42(31.1%)                          | 652(34.8%)                          | $\chi^2 = 0.77$ p = 0.380                   |
| Increase of smoking                                        | 4(21.1%)                           | 119(34.7%)                          | $\chi^2 = 1.49$ p = 0.222                   |

Supplementary Material

|                                                            |           |            |                           |
|------------------------------------------------------------|-----------|------------|---------------------------|
| Increase of drinking                                       | 14(10.4%) | 283(15.1%) | $\chi^2 = 2.25$ p = 0.134 |
| History of addiction                                       | 6(4.4%)   | 136(7.3%)  | $\chi^2 = 1.524$ p= .217  |
| Worsening the addiction problem during physical distancing | 3(50.0%)  | 39(28.7%)  | $\chi^2 = 1.254$ p= .361  |

|                                                            | <b>Dance</b><br>(N= 128) | <b>Others Exercise</b><br>(N= 1879) |                           |
|------------------------------------------------------------|--------------------------|-------------------------------------|---------------------------|
| Usage of IPEDs                                             | 43(33.6%)                | 651(34.6%)                          | $\chi^2 = 0.059$ p= .809  |
| Increase of smoking                                        | 5(27.8%)                 | 118(34.3%)                          | $\chi^2 = 0.325$ p= .569  |
| Increase of drinking                                       | 21(19.3%)                | 276(17.6%)                          | $\chi^2 = 0.196$ p= .658  |
| History of addiction                                       | 10(7.8%)                 | 132(7.0%)                           | $\chi^2 = 0.113$ p= .737  |
| Worsening the addiction problem during physical distancing | 3(30.0%)                 | 39(29.5%)                           | $\chi^2 = 0.001$ p= 1.000 |

|                                                            | <b>Martial Arts</b><br>(N=109) | <b>Others Exercise</b><br>(N=1898) |                           |
|------------------------------------------------------------|--------------------------------|------------------------------------|---------------------------|
| Usage of IPEDs                                             | 36(33.0%)                      | 658(34.7%)                         | $\chi^2 = 0.12$ p = 0.726 |
| Increase of smoking                                        | 6(54.5%)                       | 117(33.3%)                         | $\chi^2 = 2.14$ p = 0.144 |
| Increase of drinking                                       | 14(12.8%)                      | 283(14.9%)                         | $\chi^2 = 0.35$ p = 0.555 |
| History of addiction                                       | 7(6.4%)                        | 135(7.1%)                          | $\chi^2 = 0.075$ p= .784  |
| Worsening the addiction problem during physical distancing | 3(42.9%)                       | 39(28.9%)                          | $\chi^2 = 0.623$ p= .422  |

|                                                            | <b>Cycling</b><br><b>(N=99)</b> | <b>Others Exercise</b><br><b>(N=1908)</b> |                           |
|------------------------------------------------------------|---------------------------------|-------------------------------------------|---------------------------|
| Usage of IPEDs                                             | 26(26.3%)                       | 668(35.0%)                                | $\chi^2 = 3.18$ p= 0.074  |
| Increase of smoking                                        | 8(50.0%)                        | 115(33.2%)                                | $\chi^2 = 1.92$ p = 0.166 |
| Increase of drinking                                       | 14(14.1%)                       | 283(14.8%)                                | $\chi^2 = 0.04$ p = 0.850 |
| History of addiction                                       | 11(11.1%)                       | 131(6.9%)                                 | $\chi^2 = 2.580$ p= .108  |
| Worsening the addiction problem during physical distancing | 2(18.2%)                        | 40(30.5%)                                 | $\chi^2 = 0.743$ p= .507  |

|                                                            | <b>Ball Sports</b><br><b>(N=73)</b> | <b>Others Exercise</b><br><b>(N=1934)</b> |                            |
|------------------------------------------------------------|-------------------------------------|-------------------------------------------|----------------------------|
| Usage of IPEDs                                             | 26(35.6%)                           | 668(34.5%)                                | $\chi^2 = 0.04$ p = 0.849  |
| Increase of smoking                                        | 5(31.3%)                            | 118(34.1%)                                | $\chi^2 = 0.06$ p = 0.911  |
| Increase of drinking                                       | 11(15.1%)                           | 286(14.8%)                                | $\chi^2 = 0.004$ p = 0.814 |
| History of addiction                                       | 5(6.8%)                             | 137(7.1%)                                 | $\chi^2 = 0.006$ p= .939   |
| Worsening the addiction problem during physical distancing | 0(0.0%)                             | 42(30.7%)                                 | $\chi^2 = 2.177$ p= .322   |

|                      | <b>Budo</b><br><b>(N=67)</b> | <b>Others Exercise</b><br><b>(N=1940)</b> |                           |
|----------------------|------------------------------|-------------------------------------------|---------------------------|
| Usage of IPEDs       | 22(32.8%)                    | 672(34.6%)                                | $\chi^2 = 0.09$ p = 0.760 |
| Increase of smoking  | 3(60.0%)                     | 120(33.6%)                                | $\chi^2 = 1.53$ p = 0.342 |
| Increase of drinking | 7(10.4%)                     | 290(14.9%)                                | $\chi^2 = 1.04$ p = 0.308 |

|                                                            |                  |                       |                                              |
|------------------------------------------------------------|------------------|-----------------------|----------------------------------------------|
| History of addiction                                       | 4(6.0%)          | 138(7.1%)             | $\chi^2=0.129$ p= 1.000                      |
| Worsening the addiction problem during physical distancing | 1(25.0%)         | 41(29.7%)             | $\chi^2=0.041$ p= 1.000                      |
| <hr/>                                                      |                  |                       |                                              |
|                                                            | <b>Cross Fit</b> | <b>Other Exercise</b> |                                              |
|                                                            | <b>(N= 63)</b>   | <b>(N= 1944)</b>      |                                              |
| <hr/>                                                      |                  |                       |                                              |
| Usage of IPEDs                                             | <b>38(60.3%)</b> | <b>656(33.7%)</b>     | <b><math>\chi^2=19.047</math> p&lt; .001</b> |
| Increase of smoking                                        | 6(50.0%)         | 117(33.4%)            | $\chi^2=1.420$ p= .233                       |
| Increase of drinking                                       | 14(26.4%)        | 283(17.4%)            | $\chi^2=2.854$ p= .091                       |
| History of addiction                                       | 6(9.5%)          | 136(7.0%)             | $\chi^2=0.593$ p= .441                       |
| Worsening the addiction problem during physical distancing | 0(0.0%)          | 42(30.9%)             | $\chi^2=2.631$ p= .179                       |
| <hr/>                                                      |                  |                       |                                              |

Abbreviations: EAI=Exercise Addiction Inventory, AAI=Appearance Anxiety Inventory, SCS=Self-Compassion Scale

Note:  $\chi^2$  = chi square, t= Student's t-test



|                                     |                      | Confidence Interval |       |        |    |      |                   |       |       |
|-------------------------------------|----------------------|---------------------|-------|--------|----|------|-------------------|-------|-------|
|                                     |                      | B                   | ES    | Wald   | df | Sig  | Odd Ratio<br>(OR) | (CI)  |       |
|                                     |                      |                     |       |        |    |      |                   | Min   | Max   |
| Usage of IPEDs<br>(NAG)             | Age                  | .017                | .017  | 1.052  | 1  | .305 | 1.017             | .984  | 1.052 |
|                                     | Gender               | .265                | .408  | .422   | 1  | .516 | 1.303             | .586  | 2.899 |
|                                     | SCS total            | .001                | .032  | .001   | 1  | .981 | 1.001             | .939  | 1.066 |
|                                     | AAI over the Cut Off | .3195               | .431  | .550   | 1  | .458 | 1.376             | .592  | 3.201 |
|                                     | Constant             | -3.222              | 1.446 | 4.968  | 1  | .026 | .040              |       |       |
| Usage of IPEDs<br>(AG)              | Age                  | .001                | .004  | .064   | 1  | .800 | 1.001             | .993  | 1.010 |
|                                     | Gender               | -.488               | .102  | 22.706 | 1  | .000 | .614              | .502  | .750  |
|                                     | SCS total            | .009                | .009  | 1.170  | 1  | .279 | 1.010             | .992  | 1.027 |
|                                     | EAI over the Cut Off | .800                | .223  | 12.903 | 1  | .000 | 2.226             | 1.438 | 3.444 |
|                                     | AAI over the Cut Off | .698                | .126  | 30.824 | 1  | .000 | 2.009             | 1.571 | 2.571 |
|                                     | Constant             | -1.839              | .482  | 14.580 | 1  | .000 | .159              |       |       |
| Usage of IPEDs<br>(Generic Workout) | Age                  | .009                | .007  | 1.317  | 1  | .251 | 1.009             | .994  | 1.023 |
|                                     | Gender               | -.940               | .179  | 27.426 | 1  | .000 | .391              | .275  | .555  |
|                                     | SCS total            | -.002               | .014  | .018   | 1  | .892 | .998              | .970  | 1.027 |
|                                     | EAI over the Cut Off | .716                | .359  | 3.987  | 1  | .046 | 2.047             | 1.013 | 4.135 |
|                                     | AAI over the Cut Off | .472                | .208  | 5.136  | 1  | .023 | 1.604             | 1.066 | 2.413 |
|                                     | Constant             | -.533               | .776  | .472   | 1  | .492 | .587              |       |       |
| Usage of IPEDs<br>(Walking)         | Age                  | .003                | .009  | .105   | 1  | .746 | 1.003             | .985  | 1.022 |
|                                     | Gender               | .211                | .287  | .540   | 1  | .462 | 1.235             | .703  | 2.169 |
|                                     | SCS total            | .020                | .023  | .724   | 1  | .395 | 1.020             | .975  | 1.067 |

Supplementary Material

|                          |                             |              |             |              |          |             |              |              |               |
|--------------------------|-----------------------------|--------------|-------------|--------------|----------|-------------|--------------|--------------|---------------|
|                          | EAI over the Cut Off        | .805         | .710        | 1.284        | 1        | .257        | 2.236        | .556         | 8.991         |
|                          | <b>AAI over the Cut off</b> | <b>.795</b>  | <b>.327</b> | <b>5.908</b> | <b>1</b> | <b>.015</b> | <b>2.214</b> | <b>1.166</b> | <b>4.201</b>  |
|                          | Constant                    | -4.016       | 1.397       | 8.260        | 1        | .004        | .018         |              |               |
| <b>Usage of IPEDs</b>    | Age                         | .013         | .012        | 1.206        | 1        | .272        | 1.013        | .990         | 1.037         |
| <b>(Weight Lifting)</b>  | <b>Gender</b>               | <b>-.460</b> | <b>.231</b> | <b>3.963</b> | <b>1</b> | <b>.047</b> | <b>.631</b>  | <b>.401</b>  | <b>.993</b>   |
|                          | SCS total                   | .015         | .020        | .589         | 1        | .443        | 1.016        | .976         | 1.056         |
|                          | EAI over the Cut Off        | .411         | .450        | .837         | 1        | .360        | 1.509        | .625         | 3.641         |
|                          | <b>AAI over the Cut off</b> | <b>.744</b>  | <b>.282</b> | <b>6.943</b> | <b>1</b> | <b>.008</b> | <b>2.104</b> | <b>1.210</b> | <b>3.658</b>  |
|                          | Constant                    | -1.062       | 1.074       | .977         | 1        | .323        | .346         |              |               |
| <b>Usage of IPEDs</b>    | Age                         | .017         | .012        | 2.130        | 1        | .144        | 1.017        | .994         | 1.041         |
| <b>(Running)</b>         | Gender                      | -.057        | .248        | .053         | 1        | .818        | .945         | .581         | 1.536         |
|                          | SCS total                   | .013         | .022        | .348         | 1        | .555        | 1.013        | .970         | 1.058         |
|                          | EAI over the Cut Off        | 1.238        | .709        | 3.051        | 1        | .081        | 3.449        | .860         | 13.832        |
|                          | <b>AAI over the Cut off</b> | <b>.724</b>  | <b>.335</b> | <b>4.670</b> | <b>1</b> | <b>.031</b> | <b>2.062</b> | <b>1.070</b> | <b>3.974</b>  |
|                          | Constant                    | -3.515       | 1.268       | 7.685        | 1        | .006        | .030         |              |               |
| <b>Usage of IPEDs</b>    | Age                         | .010         | .013        | .661         | 1        | .416        | 1.010        | .985         | 1.036         |
| <b>(Yoga)</b>            | Gender                      | -.559        | .477        | 1.372        | 1        | .241        | .572         | .224         | 1.457         |
|                          | SCS total                   | .003         | .027        | .012         | 1        | .912        | 1.003        | .951         | 1.058         |
|                          | <b>EAI over the Cut Off</b> | <b>2.283</b> | <b>.819</b> | <b>7.769</b> | <b>1</b> | <b>.005</b> | <b>9.805</b> | <b>1.969</b> | <b>48.824</b> |
|                          | AAI over the Cut off        | .207         | .428        | .233         | 1        | .629        | 1.230        | .532         | 2.845         |
|                          | Constant                    | -2.809       | 1.640       | 2.933        | 1        | .087        | .060         |              |               |
| <b>Usage of IPEDs</b>    | Age                         | -.005        | .017        | .074         | 1        | .786        | .995         | .963         | 1.029         |
| <b>(Fighting sports)</b> | Gender                      | .003         | .393        | .000         | 1        | .994        | 1.003        | .465         | 2.165         |

|                                                |                             |              |              |              |          |             |               |              |                |
|------------------------------------------------|-----------------------------|--------------|--------------|--------------|----------|-------------|---------------|--------------|----------------|
|                                                | SCS total                   | .038         | .036         | 1.101        | 1        | .294        | 1.039         | .967         | 1.116          |
|                                                | <b>EAI over the Cut Off</b> | <b>2.564</b> | <b>1.115</b> | <b>5.290</b> | <b>1</b> | <b>.021</b> | <b>12.984</b> | <b>1.461</b> | <b>115.410</b> |
|                                                | <b>AAI over the Cut off</b> | <b>1.169</b> | <b>.528</b>  | <b>4.908</b> | <b>1</b> | <b>.027</b> | <b>3.219</b>  | <b>1.144</b> | <b>9.058</b>   |
|                                                | Constant                    | -5.671       | 2.088        | 7.376        | 1        | .007        | .003          |              |                |
| <b>Usage of IPEDs</b><br><b>(Swimming)</b>     | Age                         | -.008        | .019         | .197         | 1        | .657        | .992          | .956         | 1.029          |
|                                                | Gender                      | -.027        | .426         | .004         | 1        | .949        | .973          | .422         | 2.245          |
|                                                | SCS total                   | .011         | .035         | .095         | 1        | .757        | 1.011         | .943         | 1.084          |
|                                                | EAI over the Cut Off        | 21.815       | 22669.192    | .000         | 1        | .999        | 2.979E9       | .000         | .              |
|                                                | AAI over the Cut off        | .917         | .550         | 2.782        | 1        | .095        | 2.501         | .852         | 7.344          |
|                                                | Constant                    | -23.775      | 22669.192    | .000         | 1        | .999        | .000          |              |                |
| <b>Usage of IPEDs</b><br><b>(Dance)</b>        | Age                         | .034         | .018         | 3.573        | 1        | .059        | 1.034         | .999         | 1.071          |
|                                                | Gender                      | 20.595       | 14023.111    | .000         | 1        | .999        | 8.798E8       | .000         | .              |
|                                                | SCS total                   | .006         | .033         | .030         | 1        | .862        | 1.006         | .943         | 1.073          |
|                                                | EAI over the Cut Off        | .305         | .767         | .158         | 1        | .691        | 1.357         | .302         | 6.099          |
|                                                | AAI over the Cut off        | <b>1.055</b> | <b>.491</b>  | <b>4.611</b> | <b>1</b> | <b>.032</b> | <b>2.872</b>  | <b>1.096</b> | <b>7.521</b>   |
|                                                | Constant                    | -44.733      | 28046.221    | .000         | 1        | .999        | .000          |              |                |
| <b>Usage of IPEDs</b><br><b>(Martial Arts)</b> | Age                         | .005         | .020         | .070         | 1        | .792        | 1.005         | .967         | 1.045          |
|                                                | Gender                      | .305         | .468         | .424         | 1        | .515        | 1.357         | .542         | 3.395          |
|                                                | SCS total                   | .040         | .042         | .895         | 1        | .344        | 1.041         | .958         | 1.131          |
|                                                | EAI over the Cut Off        | 1.592        | 1.210        | 1.730        | 1        | .188        | 4.914         | .458         | 52.691         |
|                                                | AAI over the Cut off        | .933         | .605         | 2.381        | 1        | .123        | 2.542         | .777         | 8.317          |
|                                                | Constant                    | -5.355       | 2.279        | 5.522        | 1        | .019        | .005          |              |                |
| <b>Usage of IPEDs</b>                          | Age                         | -.013        | .020         | .411         | 1        | .521        | .987          | .948         | 1.027          |

Supplementary Material

(Cycling)

|                      |       |       |      |   |      |       |      |        |
|----------------------|-------|-------|------|---|------|-------|------|--------|
| Gender               | .209  | .485  | .185 | 1 | .667 | 1.232 | .476 | 3.185  |
| SCS total            | -.039 | .043  | .821 | 1 | .365 | .962  | .884 | 1.047  |
| EAI over the Cut Off | .546  | 1.625 | .113 | 1 | .737 | 1.727 | .071 | 41.735 |
| AAI over the Cut off | .729  | .827  | .778 | 1 | .378 | 2.073 | .410 | 10.474 |
| Constant             | -.931 | 2.662 | .122 | 1 | .727 | .394  |      |        |

Usage of IPEDs

|     |       |      |      |   |      |      |      |       |
|-----|-------|------|------|---|------|------|------|-------|
| Age | -.027 | .038 | .518 | 1 | .472 | .973 | .903 | 1.048 |
|-----|-------|------|------|---|------|------|------|-------|

(Ball Sports)

|                      |       |       |      |   |      |       |      |       |
|----------------------|-------|-------|------|---|------|-------|------|-------|
| Gender               | -.370 | .591  | .391 | 1 | .532 | .691  | .217 | 2.201 |
| SCS total            | -.018 | .043  | .165 | 1 | .685 | .983  | .903 | 1.069 |
| EAI over the Cut Off | .216  | .824  | .069 | 1 | .793 | 1.241 | .247 | 6.243 |
| AAI over the Cut off | .526  | .613  | .735 | 1 | .391 | 1.692 | .508 | 5.632 |
| Constant             | .242  | 2.171 | .012 | 1 | .911 | 1.274 |      |       |

Usage of IPEDs

|     |       |      |       |   |      |      |      |       |
|-----|-------|------|-------|---|------|------|------|-------|
| Age | -.033 | .025 | 1.800 | 1 | .180 | .967 | .922 | 1.015 |
|-----|-------|------|-------|---|------|------|------|-------|

(Budo)

|                      |         |           |       |   |       |         |      |       |
|----------------------|---------|-----------|-------|---|-------|---------|------|-------|
| Gender               | .294    | .567      | .269  | 1 | .604  | 1.342   | .442 | 4.080 |
| SCS total            | .060    | .056      | 1.183 | 1 | .277  | 1.062   | .953 | 1.185 |
| EAI over the Cut Off | 22.561  | 40192.886 | .000  | 1 | 1.000 | 6.284E9 | .000 | .     |
| AAI over the Cut off | .344    | .856      | .161  | 1 | .688  | 1.411   | .263 | 7.557 |
| Constant             | -24.756 | 40192.886 | .000  | 1 | 1.000 | .000    |      |       |

Usage of IPEDs

|     |      |      |      |   |      |       |      |       |
|-----|------|------|------|---|------|-------|------|-------|
| Age | .013 | .037 | .113 | 1 | .737 | 1.013 | .941 | 1.090 |
|-----|------|------|------|---|------|-------|------|-------|

(Cross Fit)

|                      |       |       |       |   |      |       |      |        |
|----------------------|-------|-------|-------|---|------|-------|------|--------|
| Gender               | -.694 | .596  | 1.356 | 1 | .244 | .499  | .155 | 1.607  |
| SCS total            | -.005 | .055  | .008  | 1 | .931 | .995  | .893 | 1.109  |
| EAI over the Cut Off | .767  | 1.227 | .391  | 1 | .532 | 2.154 | .194 | 23.868 |
| AAI over the Cut off | .454  | .653  | .483  | 1 | .487 | 1.574 | .438 | 5.656  |
| Constant             | -.048 | 2.986 | .000  | 1 | .987 | .953  |      |        |

Gender: “1” – male, “2” – female; EAI over the Cut Off : “0” < 24 , “1” ≥ 24; AAI over the Cut Off : “0” < 21 , “1” ≥ 21.

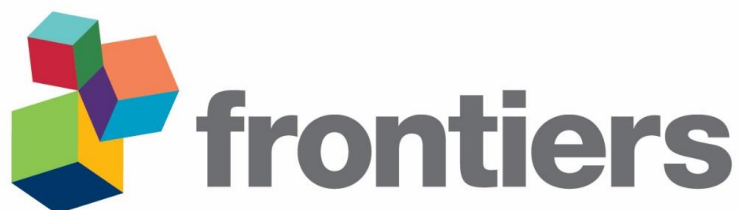

**Supplementary Figure 1.** The figure legends are required to have the same font as the main text, 12 point normal Times New Roman, single spaced. Please use a single paragraph for each legend and prepare the figures keeping in mind the PDF layout.
